# Supplementary material for: Discovery of novel mRNA demethylase FTO inhibitors against esophageal cancer
Source: PubMed Central journal article supplement (PMC9291647; doi:10.1080/14756366.2022.2098954), 2022-07-14

## Discovery of novel mRNA demethylase FTO inhibitors against esophageal cancer

Bo Qin<sup>a##</sup>, Qian Bai<sup>b#</sup>, Dan Yan<sup>a</sup>, Fanxiang Yin<sup>a</sup>, Zhu Zhu<sup>a</sup>, Chaoyuan Xia<sup>a</sup>, Yang Yang<sup>a\*</sup>, Yi Zhao<sup>a\*</sup>

<sup>a</sup>The First Affiliated Hospital of Zhengzhou University, No.1 Eastern Jianshe Road, Zhengzhou, Henan, China

<sup>b</sup>The Second Affiliated Hospital of Zhengzhou University, No.2 Jingba Road, Zhengzhou, Henan, China

#These authors contributed equally to this work.

\*Corresponding author: Bo Qin ([boqin@mail.ustc.edu.cn](mailto:boqin@mail.ustc.edu.cn)), Yang Yang ([yangyangbio@163.com](mailto:yangyangbio@163.com)) and Yi Zhao ([zhaoyi0910@163.com](mailto:zhaoyi0910@163.com)).

### 2,3,4,5,6-Pentafluoro-N-(prop-2-yn-1-yl)benzamide (B)

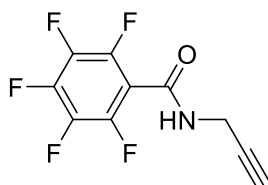

White solid, yield: 79%. Mp: 83-85 °C. <sup>1</sup>H NMR (400 MHz, DMSO-*d*<sub>6</sub>) δ 9.40 (s, 1H), 4.10 (dd, *J* = 5.5, 2.5 Hz, 2H), 3.21 (s, 1H). <sup>13</sup>C NMR (100 MHz, DMSO-*d*<sub>6</sub>) δ 156.41, 144.34, 141.87, 139.98, 138.16, 135.66, 111.95, 79.78, 73.67, 28.64. HR-MS (ESI): calcd for C<sub>10</sub>H<sub>5</sub>F<sub>5</sub>NO, [M+H]<sup>+</sup> 250.0291; found: 250.0297. Purity: 96.82%.

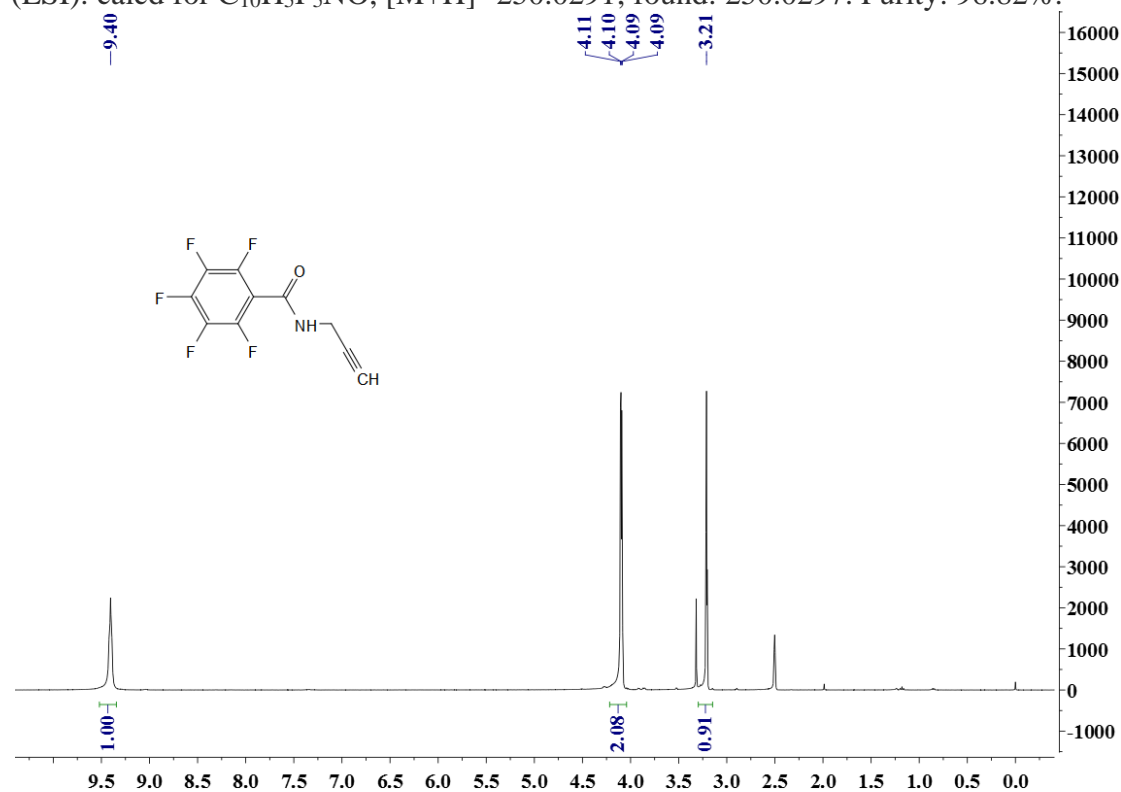

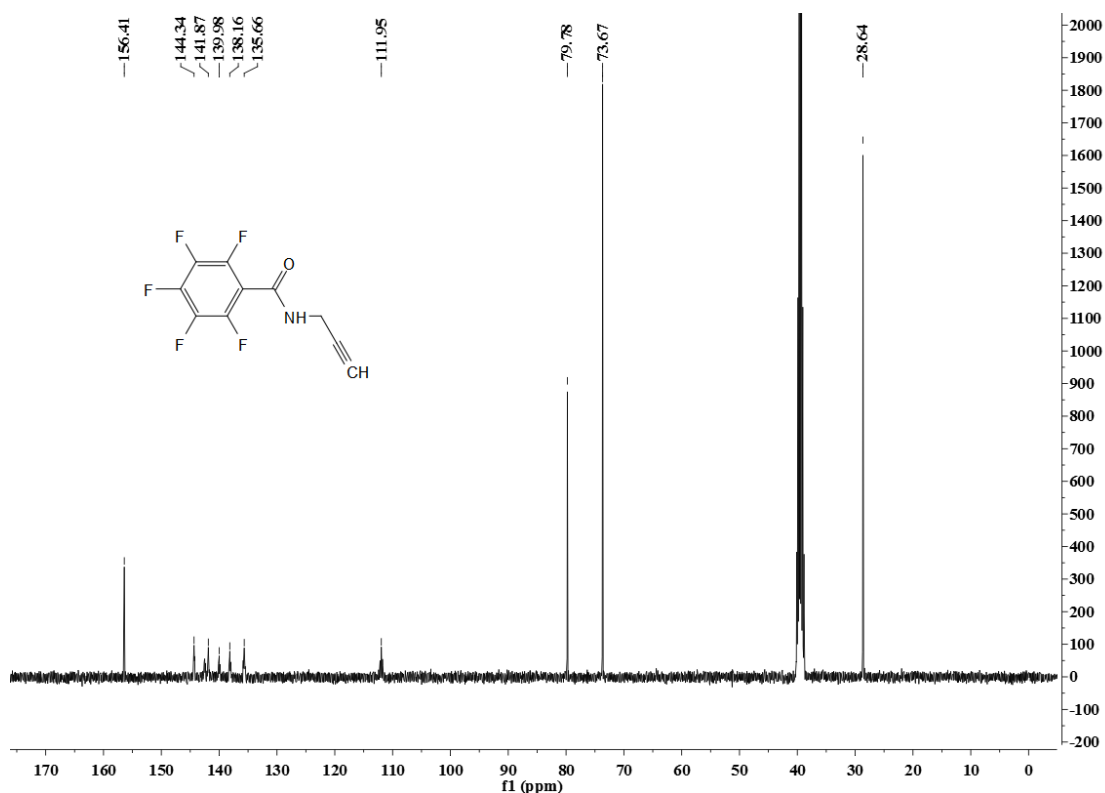

*N*-((1-((2-chloropyridin-3-yl)methyl)-1H-1,2,3-triazol-4-yl)methyl)-2,3,4,5,6-pentafluorobenzamide (C1)

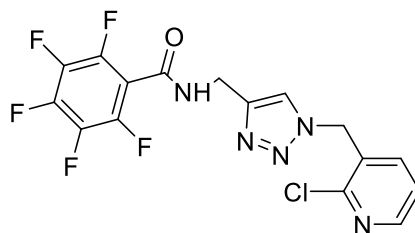

White solid, yield: 83%. Mp: 152-154 °C.  $^1\text{H}$  NMR (400 MHz,  $\text{DMSO-}d_6$ )  $\delta$  9.44 (t,  $J = 5.4$  Hz, 1H), 8.45 (d,  $J = 2.3$  Hz, 1H), 8.13 (s, 1H), 7.81 (dd,  $J = 8.3, 2.5$  Hz, 1H), 7.55 (d,  $J = 8.2$  Hz, 1H), 5.69 (s, 2H), 4.53 (d,  $J = 5.6$  Hz, 2H).  $^{13}\text{C}$  NMR (100 MHz,  $\text{DMSO-}d_6$ )  $\delta$  156.55, 150.08, 149.48, 144.01, 139.57, 131.36, 124.41, 123.34, 49.37, 34.87. HR-MS (ESI): calcd for  $\text{C}_{16}\text{H}_{10}\text{ClF}_5\text{N}_5\text{O}$ ,  $[\text{M}+\text{H}]^+$  418.0494; found: 418.0498. Purity: 97.43%.

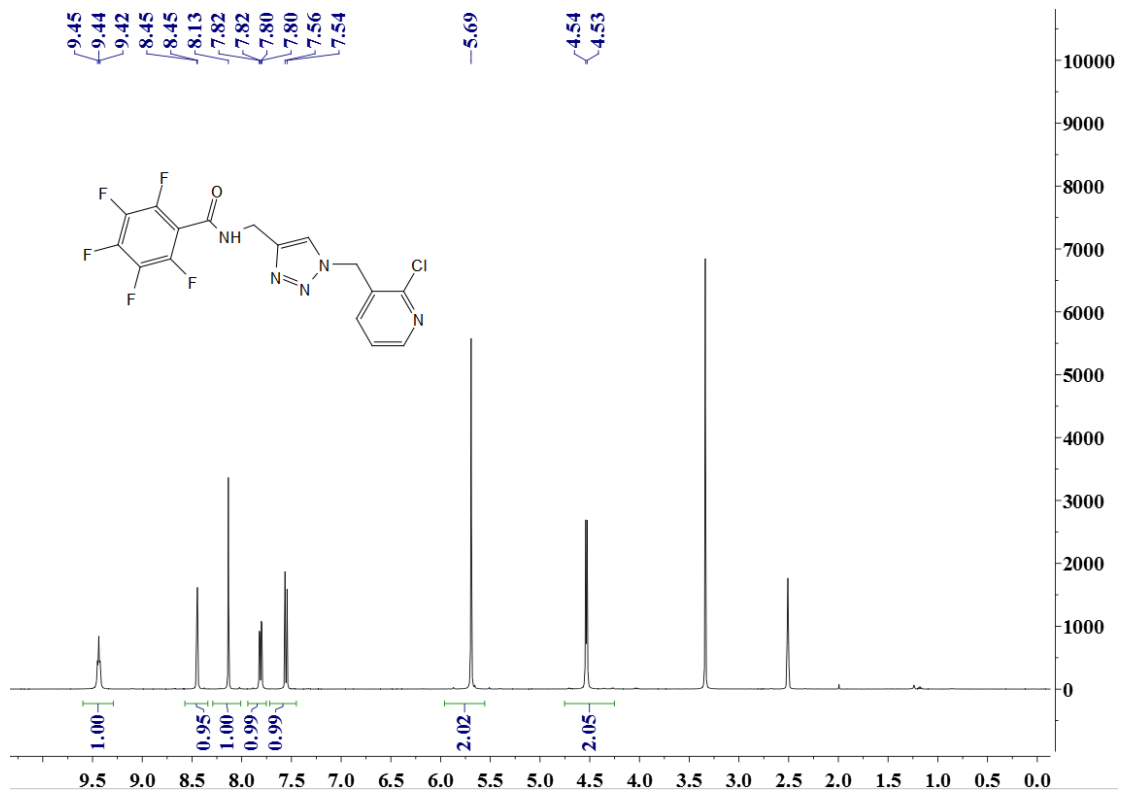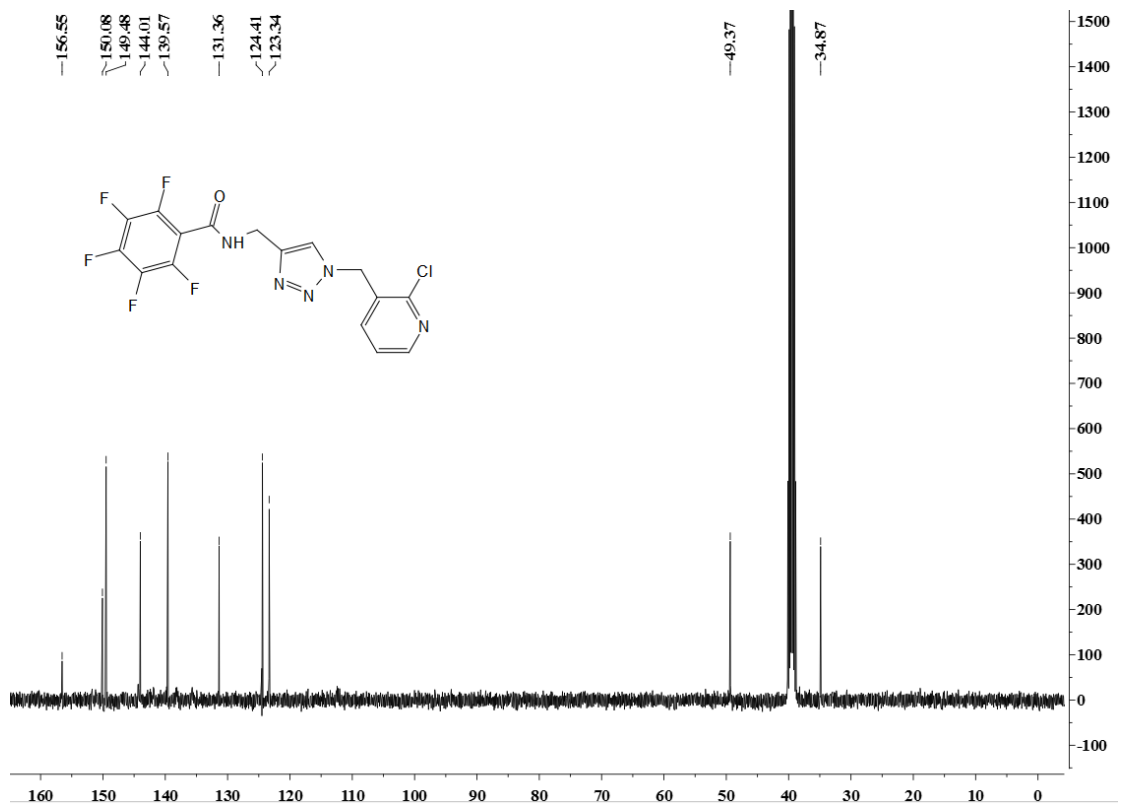

*N*-((1-((6-chloropyridin-3-yl)methyl)-1H-1,2,3-triazol-4-yl)methyl)-2,3,4,5,6-pentafluorobenzamide (C2)

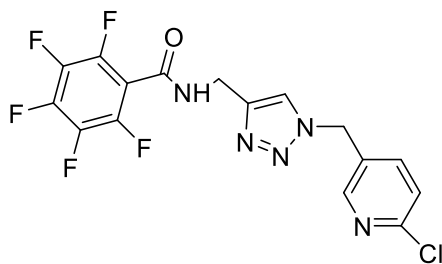

White solid, yield: 80%. Mp: 148-150 °C.  $^1\text{H}$  NMR (400 MHz,  $\text{DMSO-}d_6$ )  $\delta$  9.44 (t,  $J = 5.4$  Hz, 1H), 8.45 (d,  $J = 2.3$  Hz, 1H), 8.14 (s, 1H), 7.81 (dd,  $J = 8.3, 2.5$  Hz, 1H), 7.55 (d,  $J = 8.2$  Hz, 1H), 5.69 (s, 2H), 4.53 (d,  $J = 5.6$  Hz, 2H).  $^{13}\text{C}$  NMR (100 MHz,  $\text{DMSO-}d_6$ )  $\delta$  156.55, 150.08, 149.48, 144.01, 139.57, 131.35, 124.40, 123.33, 49.37, 34.87. HR-MS (ESI): calcd for  $\text{C}_{16}\text{H}_{10}\text{ClF}_5\text{N}_5\text{O}$ ,  $[\text{M}+\text{H}]^+$  418.0494; found: 418.0498. Purity: 97.57%.

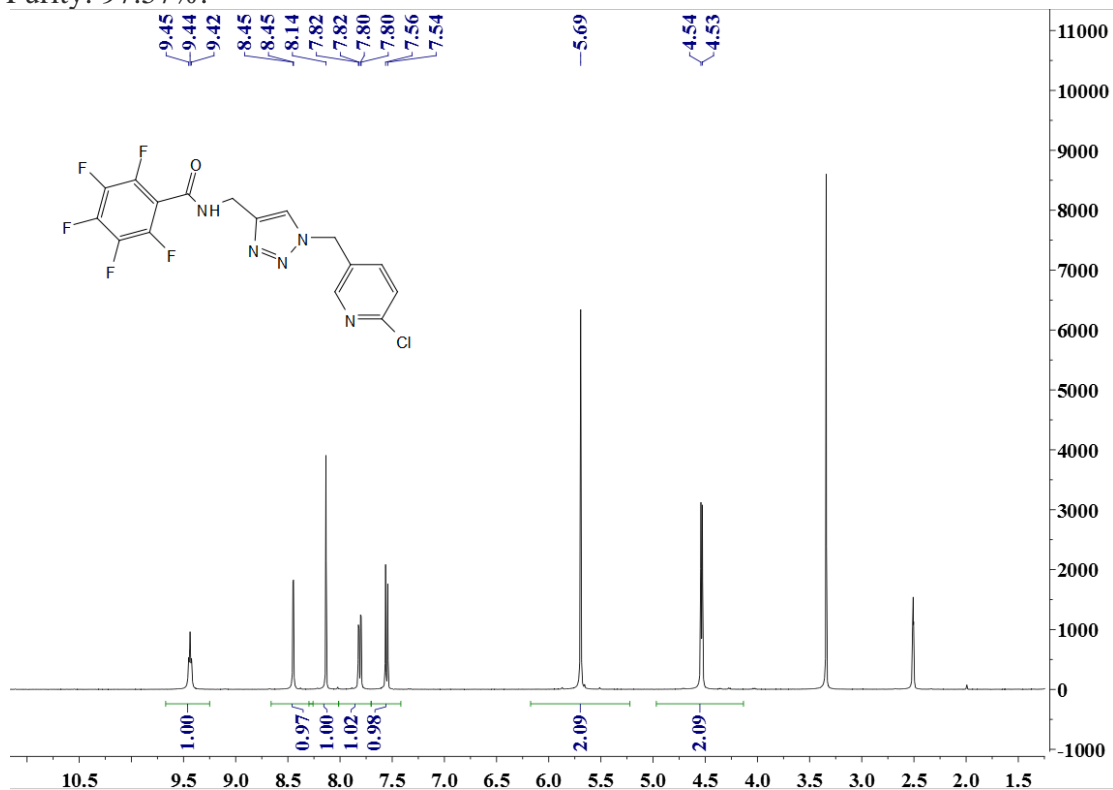

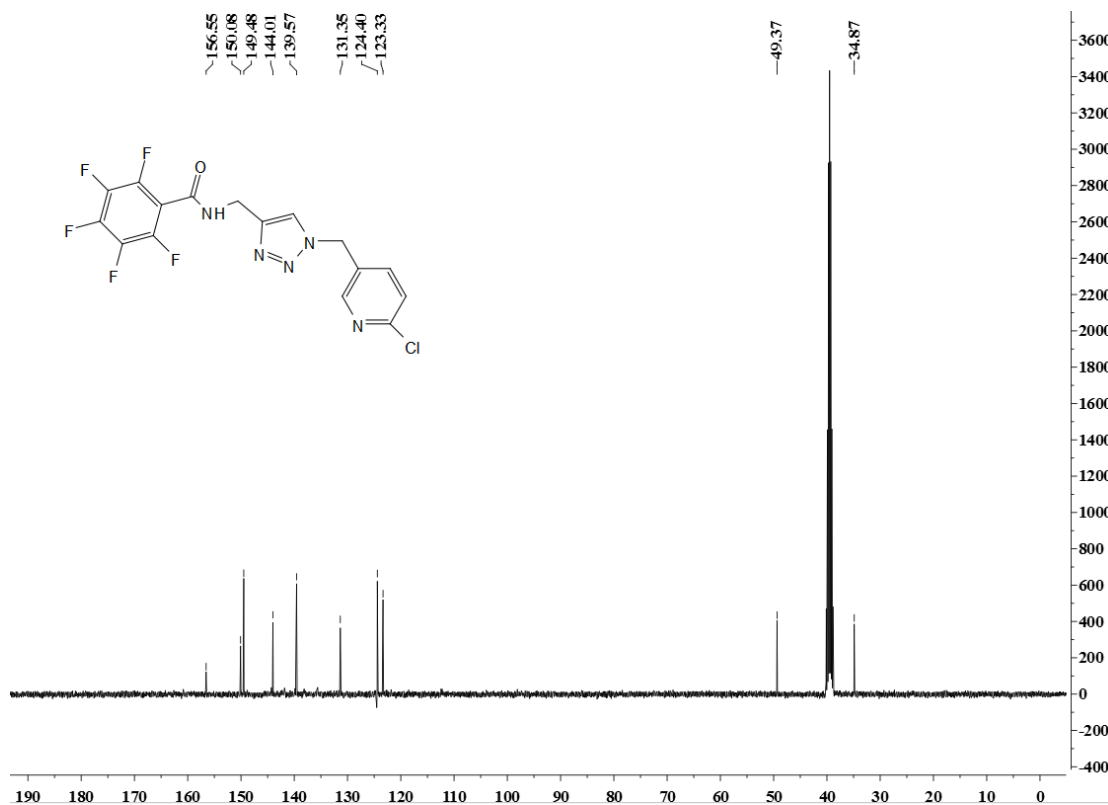

**2,3,4,5,6-pentafluoro-N-((1-(pyridin-4-ylmethyl)-1H-1,2,3-triazol-4-yl)methyl)benzamide (C3)**

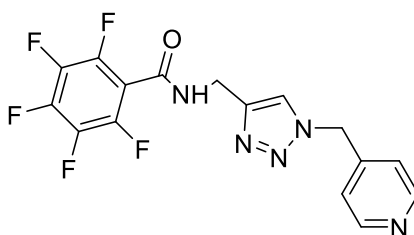

White solid, yield: 72%. Mp: 108-110 °C. <sup>1</sup>H NMR (400 MHz, DMSO-*d*<sub>6</sub>) δ 9.49 (t, *J* = 5.4 Hz, 1H), 8.57 (d, *J* = 3.8 Hz, 2H), 8.16 (s, 1H), 7.21 (d, *J* = 5.6 Hz, 2H), 5.72 (s, 2H), 4.58 (d, *J* = 5.6 Hz, 2H). <sup>13</sup>C NMR (100 MHz, DMSO-*d*<sub>6</sub>) δ 156.58, 149.96, 144.90, 144.02, 123.76, 122.24, 51.44, 34.89. HR-MS (ESI): calcd for C<sub>16</sub>H<sub>11</sub>F<sub>5</sub>N<sub>5</sub>O, [M+H]<sup>+</sup> 384.0884; found: 384.0889. Purity: 98.06%.

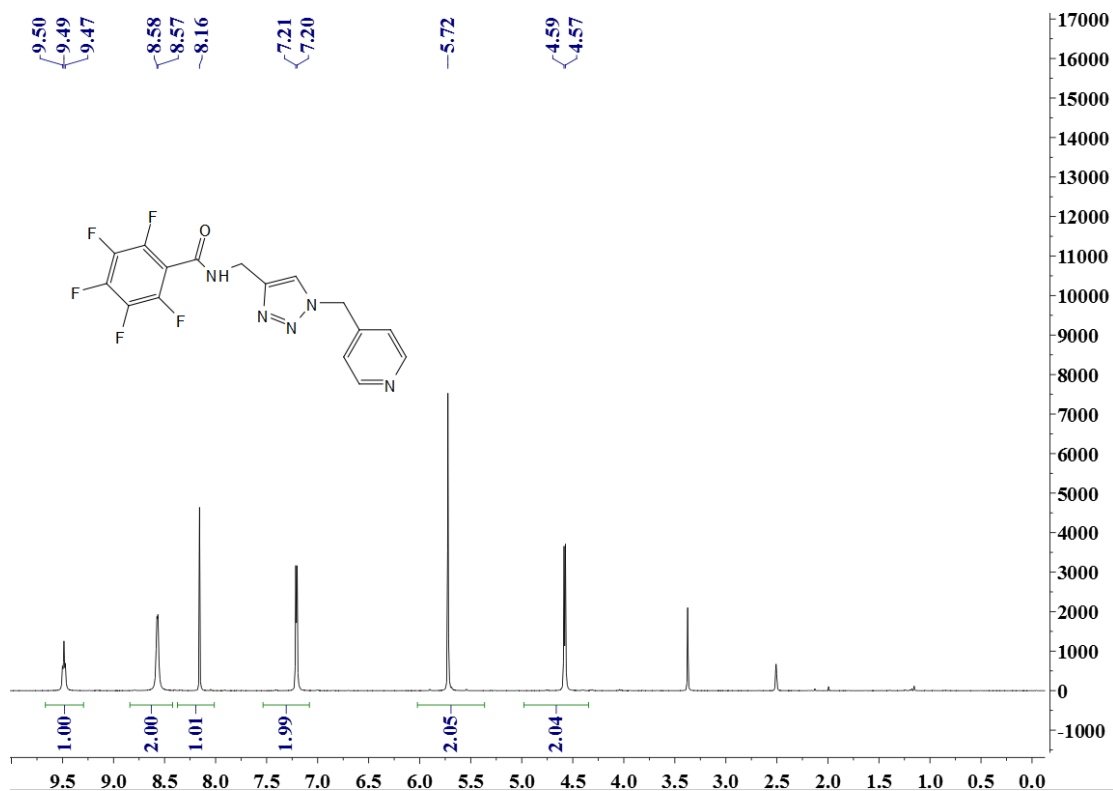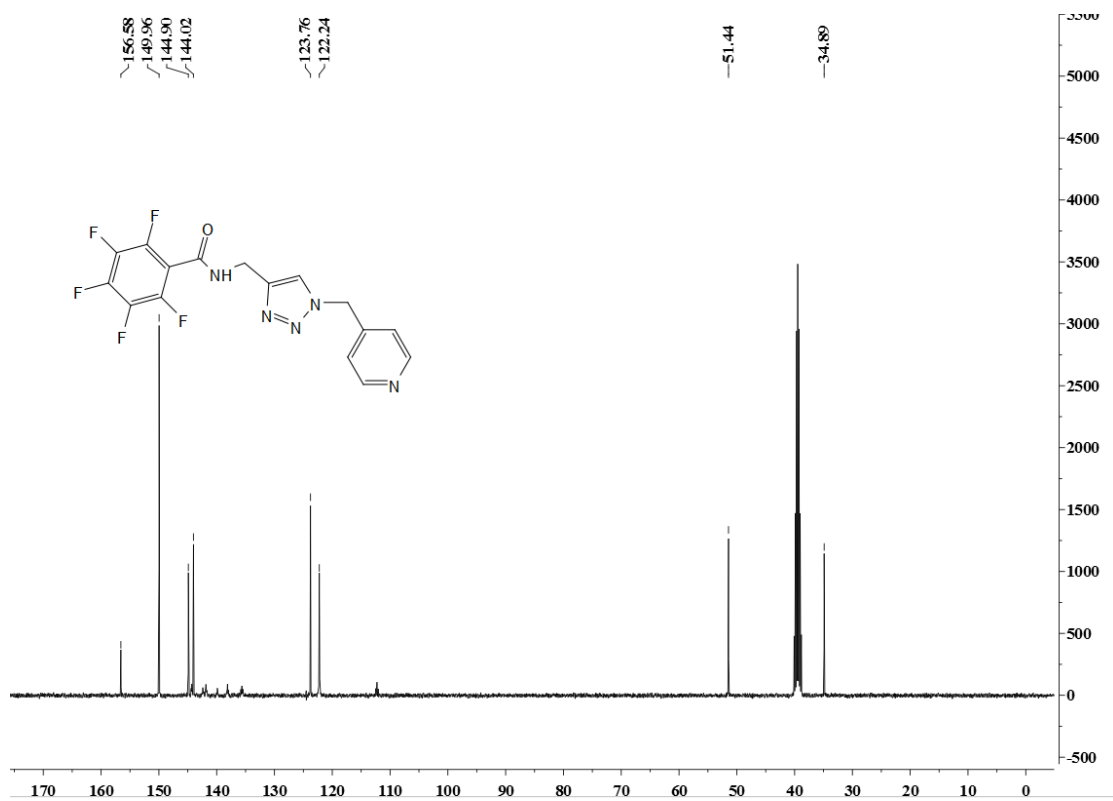

**2,3,4,5,6-pentafluoro-N-((1-(pyridin-2-ylmethyl)-1H-1,2,3-triazol-4-yl)methyl)benzamide (C4)**

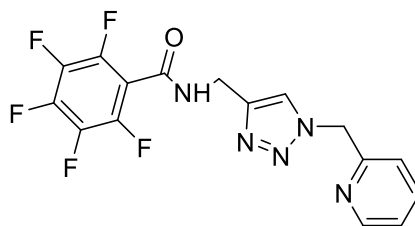

White solid, yield: 88%. Mp: 149-151 °C.  $^1\text{H}$  NMR (400 MHz,  $\text{DMSO-}d_6$ )  $\delta$  9.47 (t,  $J = 5.3$  Hz, 1H), 8.55 (d,  $J = 4.2$  Hz, 1H), 8.08 (s, 1H), 7.83 (td,  $J = 7.7, 1.7$  Hz, 1H), 7.60 – 7.09 (m, 2H), 5.73 (s, 2H), 4.56 (d,  $J = 5.6$  Hz, 2H).  $^{13}\text{C}$  NMR (100 MHz,  $\text{DMSO-}d_6$ )  $\delta$  156.55, 155.02, 149.40, 143.68, 137.27, 123.78, 123.20, 122.14, 54.34, 34.90. HR-MS (ESI): calcd for  $\text{C}_{16}\text{H}_{11}\text{F}_5\text{N}_5\text{O}$ ,  $[\text{M}+\text{H}]^+$  384.0884; found: 384.0887. Purity: 96.99%.

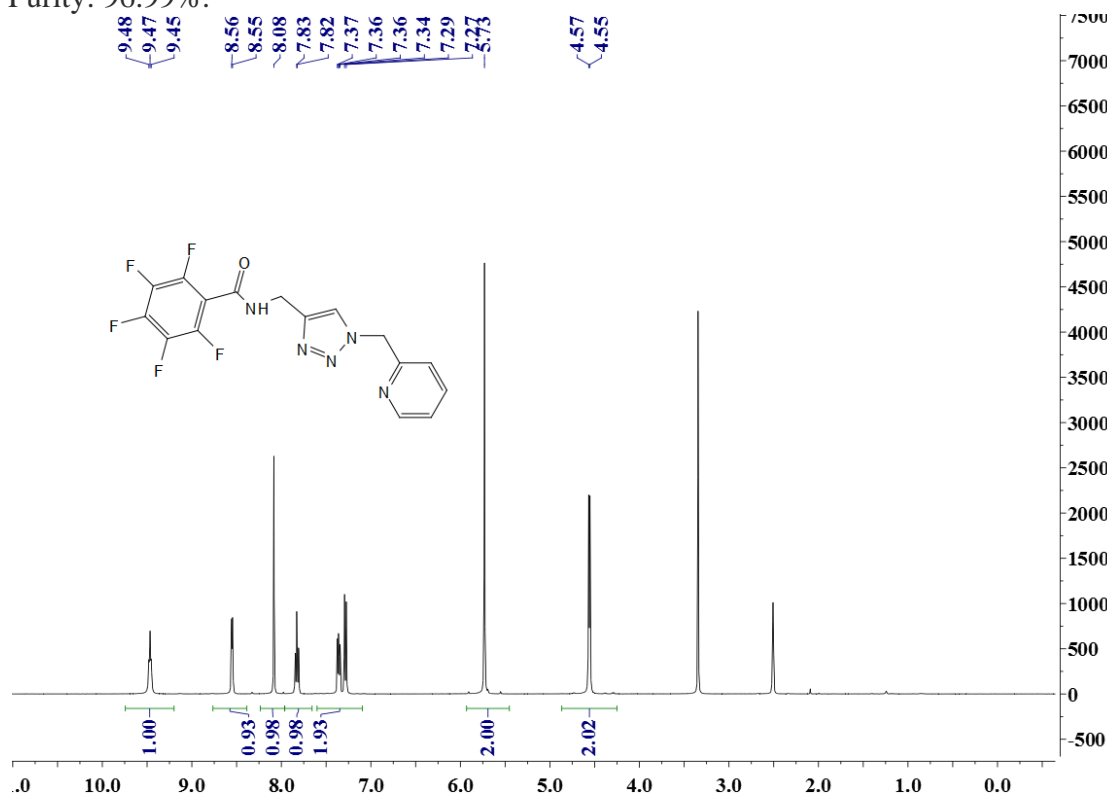

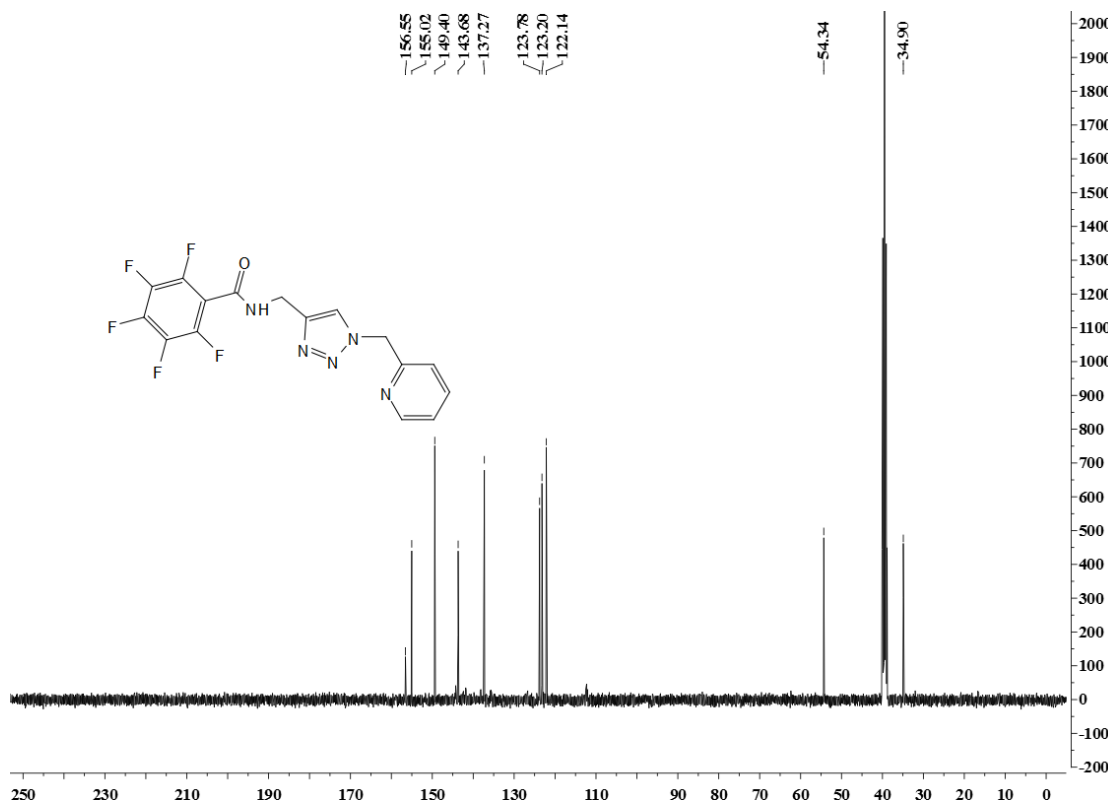

**2,3,4,5,6-pentafluoro-N-((1-((3-methyl-4-(2,2,2-trifluoroethoxy)pyridin-2-yl)methyl)-1,2,3-triazol-4-yl)methyl)benzamide (C5)**

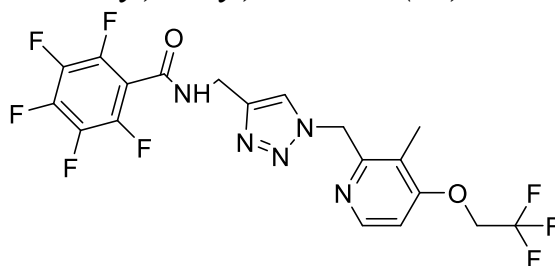

White solid, yield: 69%. Mp: 156-158 °C. <sup>1</sup>H NMR (400 MHz, DMSO-*d*<sub>6</sub>) δ 9.44 (t, *J* = 5.5 Hz, 1H), 8.30 (d, *J* = 5.6 Hz, 1H), 7.92 (s, 1H), 7.13 (d, *J* = 5.7 Hz, 1H), 5.74 (s, 2H), 4.92 (q, *J* = 8.7 Hz, 2H), 4.54 (d, *J* = 5.6 Hz, 2H), 2.22 (s, 3H). <sup>13</sup>C NMR (100 MHz, DMSO-*d*<sub>6</sub>) δ 161.30, 156.55, 153.95, 148.03, 143.45, 123.62, 120.06, 107.33, 64.82, 64.48, 52.43, 34.90, 9.70. HR-MS (ESI): calcd for C<sub>19</sub>H<sub>14</sub>F<sub>8</sub>N<sub>5</sub>O<sub>2</sub>, [M+H]<sup>+</sup> 496.1020; found: 496.1025. Purity: 97.43%.



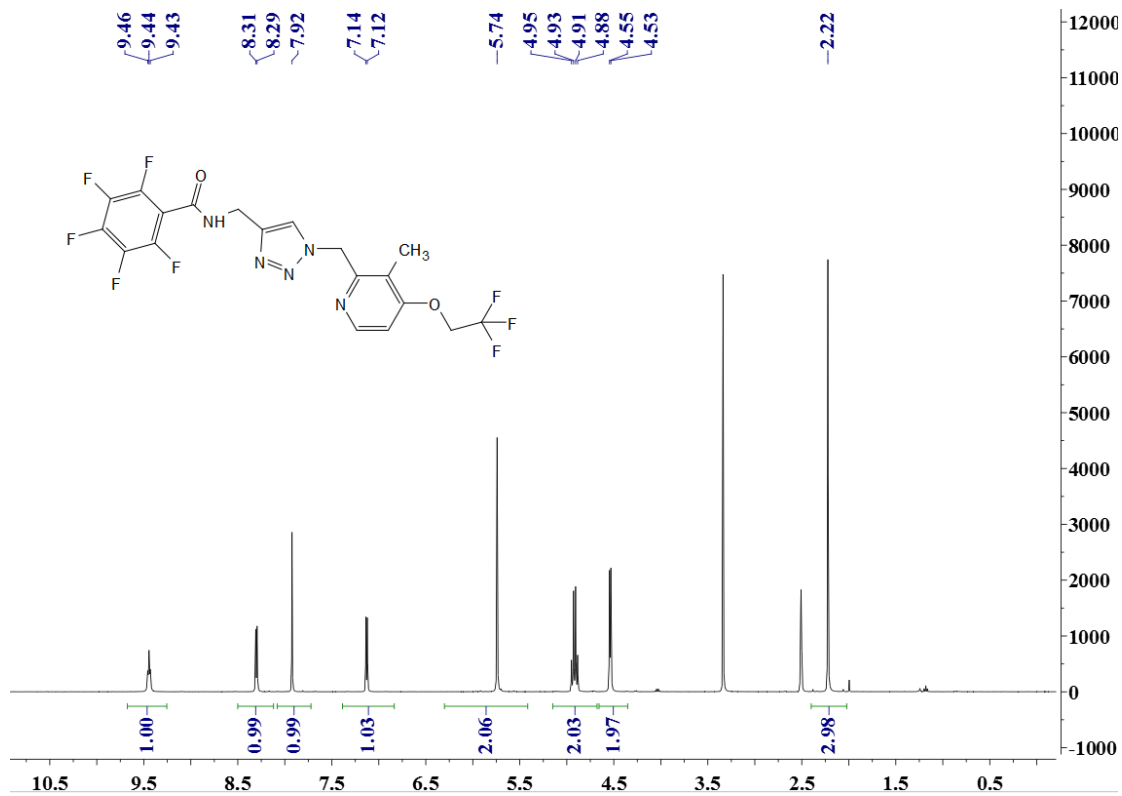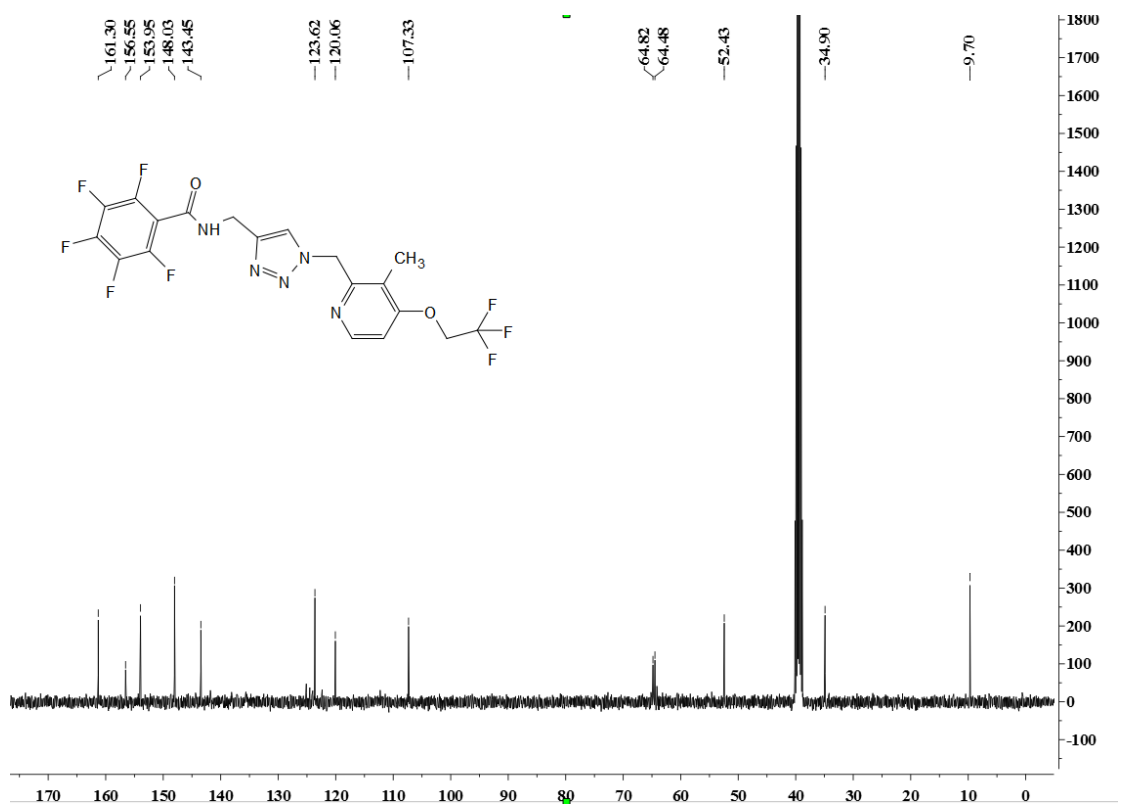

**2,3,4,5,6-pentafluoro-N-((1-((4-methoxy-3,5-dimethylpyridin-2-yl)methyl)-1H-1,2,3-triazol-4-yl)methyl)benzamide (C6)**

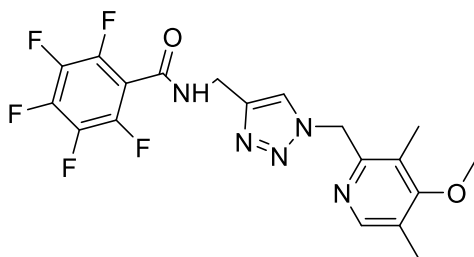

White solid, yield: 62%. Mp: 135-137 °C.  $^1\text{H}$  NMR (400 MHz,  $\text{DMSO-}d_6$ )  $\delta$  9.44 (t,  $J = 5.3$  Hz, 1H), 8.18 (s, 1H), 7.90 (s, 1H), 5.69 (s, 2H), 4.53 (d,  $J = 5.6$  Hz, 2H), 3.73 (s, 3H), 2.23 (d,  $J = 19.3$  Hz, 6H).  $^{13}\text{C}$  NMR (100 MHz,  $\text{DMSO-}d_6$ )  $\delta$  163.57, 156.54, 152.66, 148.99, 143.45, 125.78, 124.66, 123.48, 59.79, 52.57, 34.91, 12.87, 10.39. HR-MS (ESI): calcd for  $\text{C}_{19}\text{H}_{17}\text{F}_5\text{N}_5\text{O}_2$ ,  $[\text{M}+\text{H}]^+$  442.1302; found: 442.1307. Purity: 99.53%.

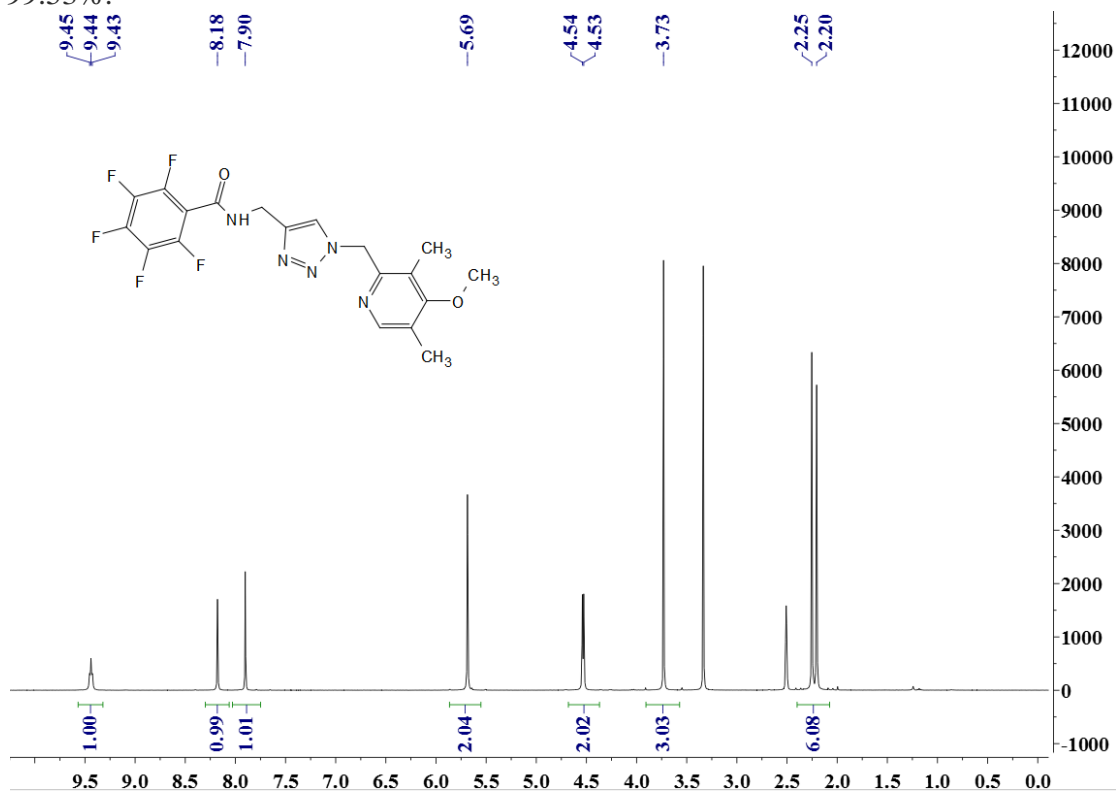

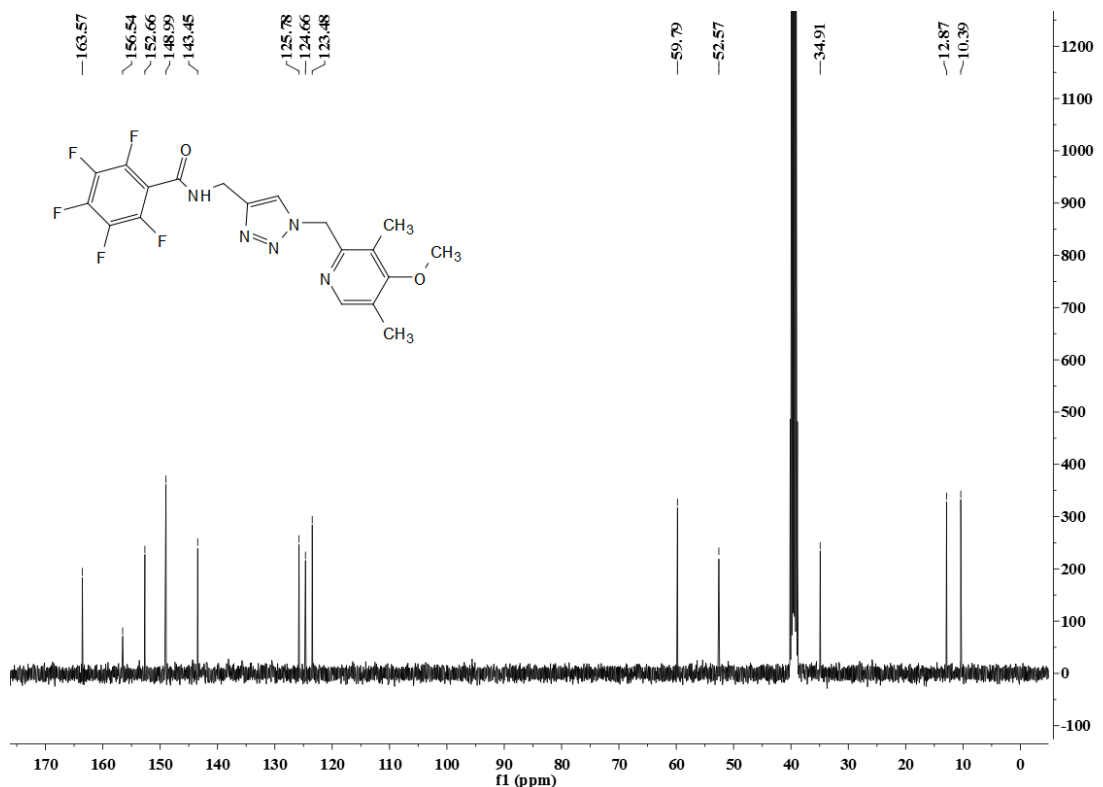

***N*-((1-((6-chloropyridin-2-yl)methyl)-1H-1,2,3-triazol-4-yl)methyl)-2,3,4,5,6-pentafluorobenzamide (C7)**

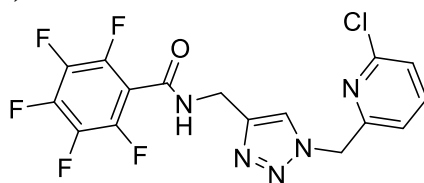

White solid, yield: 88%. Mp: 148-150 °C. <sup>1</sup>H NMR (400 MHz, DMSO-*d*<sub>6</sub>) δ 9.44 (t, *J* = 5.3 Hz, 1H), 8.45 (d, *J* = 2.3 Hz, 1H), 8.14 (s, 1H), 7.81 (dd, *J* = 8.3, 2.5 Hz, 1H), 7.55 (d, *J* = 8.2 Hz, 1H), 5.69 (s, 2H), 4.54 (d, *J* = 5.5 Hz, 2H). <sup>13</sup>C NMR (100 MHz, DMSO-*d*<sub>6</sub>) δ 156.55, 150.09, 149.47, 144.01, 139.55, 131.34, 124.39, 123.33, 49.38, 34.88. HR-MS (ESI): calcd for C<sub>16</sub>H<sub>10</sub>ClF<sub>5</sub>N<sub>5</sub>O, [M+H]<sup>+</sup> 418.0494; found: 418.0497. Purity: 98.24%.

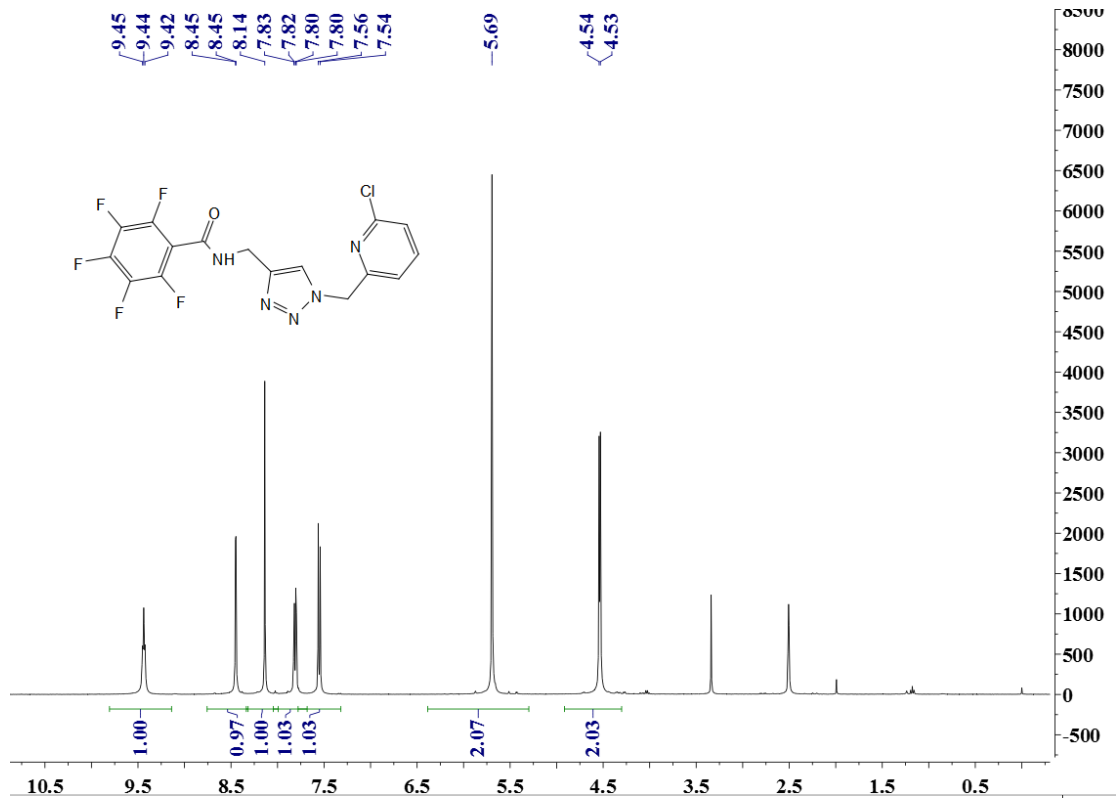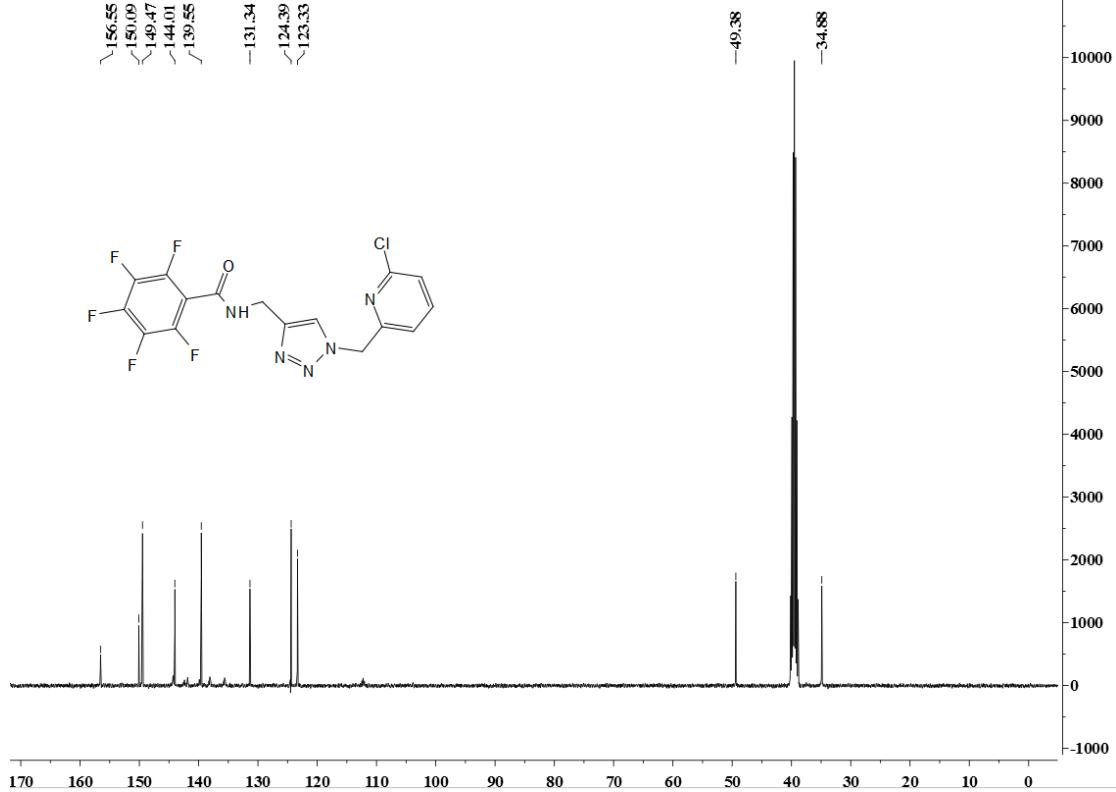

*N*-((1-((1H-benzod[j]imidazol-2-yl)methyl)-1H-1,2,3-triazol-4-yl)methyl)-2,3,4,5,6-pentafluorobenzamide (C8)

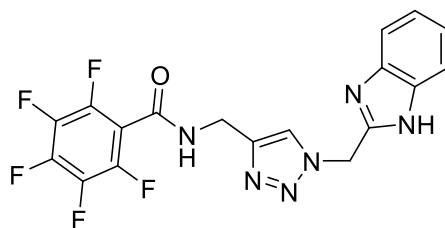

White solid, yield: 73%. Mp: 232-234 °C.  $^1\text{H}$  NMR (400 MHz,  $\text{DMSO-}d_6$ )  $\delta$  12.68 (s, 1H), 9.46 (t,  $J = 5.4$  Hz, 1H), 8.13 (s, 1H), 7.55 (dd,  $J = 35.7, 7.6$  Hz, 2H), 7.34 – 6.97 (m, 2H), 5.88 (s, 2H), 4.57 (d,  $J = 5.6$  Hz, 2H).  $^{13}\text{C}$  NMR (100 MHz,  $\text{DMSO-}d_6$ )  $\delta$  156.59, 148.24, 143.84, 123.66, 47.24, 34.89. HR-MS (ESI): calcd for  $\text{C}_{18}\text{H}_{12}\text{F}_5\text{N}_6\text{O}$ ,  $[\text{M}+\text{H}]^+$  423.0993; found: 423.0998. Purity: 98.15%.

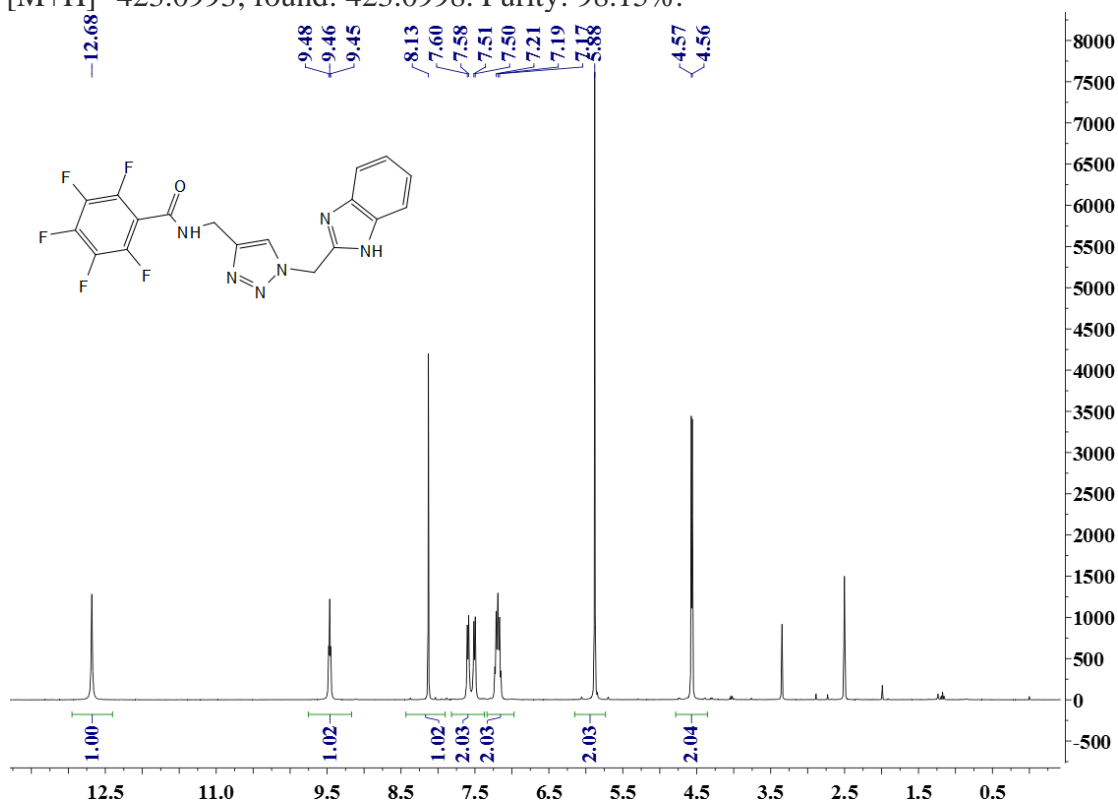

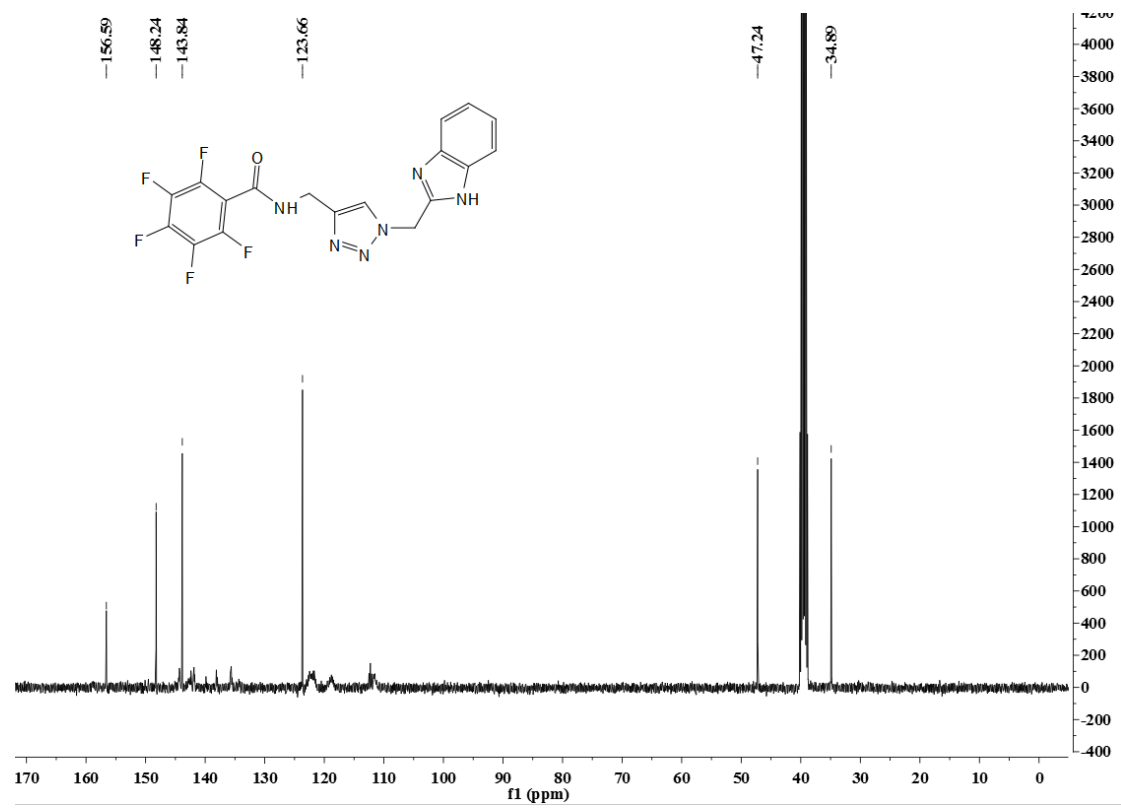

Supplement: IENZ_A_2098954_SM6791.pdf [file IENZ_A_2098954_SM6791.pdf]
